# Supplementary material for: Development of a cell-free toehold switch for hepatitis A virus type I on-site detection
Source: Royal Society of Chemistry journal article supplement (doi:10.1039/d3ay01408h), 2023-01-01

## Development of cell-free toehold switch for hepatitis A virus type I on-site detection

### Supplementary material

**Table S1. Sequences of 10 pairs toehold switch sensors and corresponding target trigger RNAs**

|    | Target sequence                         | Sensor sequence                                                                                             | Normalized ensemble defect (%) |
|----|-----------------------------------------|-------------------------------------------------------------------------------------------------------------|--------------------------------|
| S1 | AAUGCAGGAAGCCAUUAA<br>AGAAUUGAGAUUAGAAG | GGGCUUCUAAUCUCAAUUCUUUAUAUGGCUUCCUGCAUUGG<br>ACUUUAGAACAGAGGAGAUAAAGAUGAAUGCAGGAAGCAACC<br>UGGCGGCAGCGCAAAG | 17.2                           |
| S2 | GCAGGAAGCCAUUAAAGA<br>AUUGAGAUUAGAAGUUG | GGGCAACUUCUAAUCUCAAUUCUUUAUAUGGCUUCCUGCGG<br>ACUUUAGAACAGAGGAGAUAAAGAUGGCAGGAAGCCACAACC<br>UGGCGGCAGCGCAAAG | 17.5                           |
| S3 | AUGCAGGAAGCCAUUAAA<br>GAAUUGAGAUUAGAAGU | GGGACUUCUAAUCUCAAUUCUUUAUAUGGCUUCCUGCAUGG<br>ACUUUAGAACAGAGGAGAUAAAGAUGAUGCAGGAAGCGAACC<br>UGGCGGCAGCGCAAAG | 17.6                           |
| S4 | CAGGAAGCCAUUAAAGAA<br>UUGAGAUUAGAAGUUGG | GGGCCAACUUCUAAUCUCAAUUCUUUAUAUGGCUUCCUGGG<br>ACUUUAGAACAGAGGAGAUAAAGAUGCAGGAAGCCAUCAACC<br>UGGCGGCAGCGCAAAG | 17.9                           |
| S5 | UGCAGGAAGCCAUUAAAG<br>AAUUGAGAUUAGAAGUU | GGGAACUUCUAAUCUCAAUUCUUUAUAUGGCUUCCUGCAGG<br>ACUUUAGAACAGAGGAGAUAAAGAUGUGCAGGAAGCCUAACC<br>UGGCGGCAGCGCAAAG | 18.9                           |
| S6 | GAAUGCAGGAAGCCAUUA<br>AAGAAUUGAGAUUAGAA | GGGUUCUAAUCUCAAUUCUUUAUAUGGCUUCCUGCAUUCGG<br>ACUUUAGAACAGAGGAGAUAAAGAUGGAAUGCAGGAACAACC<br>UGGCGGCAGCGCAAAG | 17.8                           |
| S7 | AGAAUGCAGGAAGCCAUU                      | GGGUCUAAUCUCAAUUCUUUAUAUGGCUUCCUGCAUUCUGG                                                                   | 18.6                           |

|     |                     |                                            |      |
|-----|---------------------|--------------------------------------------|------|
|     | AAAGAAUUGAGAUUAGA   | ACUUUAGAACAGAGGAGAUAAAGAUGAGAAUUCAGGAAAACC |      |
|     |                     | UGGCGGCAGCGCAAAG                           |      |
|     |                     | GGGCCAACUUCUAAUCUCAUUCUUUAUUGGCUUCCUGG     |      |
| S8  | AGGAAGCCAUUAAAGAAU  | ACUUUAGAACAGAGGAGAUAAAGAUGAGGAAGCCAUACAACC | 18.2 |
|     | UGAGAUUAGAAGUUGGG   | UGGCGGCAGCGCAAAG                           |      |
|     |                     | GGGUUUGUUUCCCAACUUCUAAUCUCAUUCUUUAUUGGG    |      |
| S9  | CAUUAAGAAUUGAGAUU   | ACUUUAGAACAGAGGAGAUAAAGAUGCAUUAAGAAUAACC   | 20.9 |
|     | AGAAGUUGGAAACAAA    | UGGCGGCAGCGCAAAG                           |      |
|     |                     | GGGCAAAUAGCAACUAAAAGACAAUUAUCAUGAGUGGGA    |      |
| S10 | CACUCUGAUGAAUUAUUUG | CUUUAGAACAGAGGAGAUAAAGAUGCACUCUGAUGACAACCU | 24.2 |
|     | UCUUUAGUUGCUAUUUUG  | GGCGGCAGCGCAAAG                            |      |

**Fig S1. Partial trigger and switch candidate sequences.**

Normalized ensemble defect:

trigger\_strand AAUGCAGGAAGCCAUUAAAGAAUUGAGAUUAGAAG

switch\_strand GGGCUUCUAAUCUCAUUCUUUAUUGGCUUCCUGCAUUGGACUUUAGAACAGGAGAU

AAAGAUGAAUUCAGGAAGCAACCUGGCGGCAGCGCAAAG

[To Analysis](#)

**Fig S2. Probability shading structure after analysis of a sequence.**

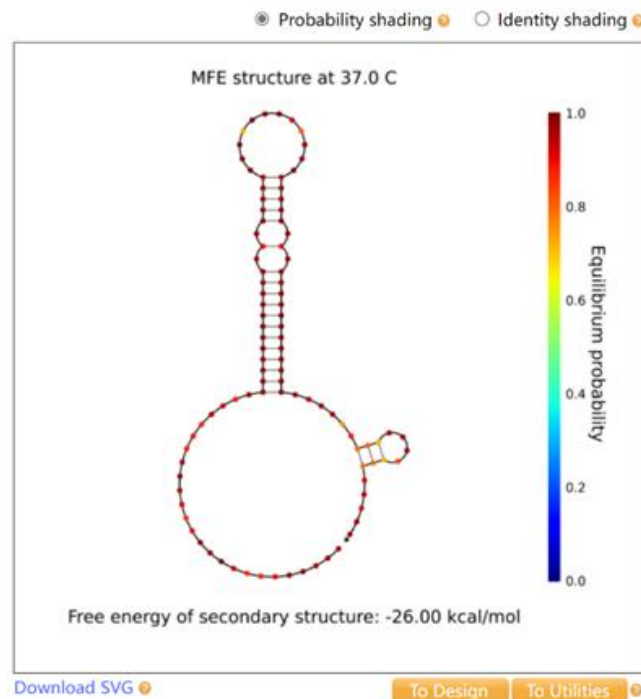

**Table S2. Sequences of different genotypes of HAV for experiments**

|         | sequence                                                                     | identities |
|---------|------------------------------------------------------------------------------|------------|
| HAV-I   | cagtataaaaaagagaaatTTGGCTGTGAAAACAGTCCCTAATTTCTAGGGGTGGAAGTACTTCATTG         | 91%        |
|         | acaattcctcctgagcatactgagctttgttccaactctaactcaattctttataggctcctgcattctat      |            |
|         | gtgactctcaaatctttgtcctcctctgatctaggatcatccactgatgactccaagtctccagctgcaattctgc |            |
|         | tcatcattgattcagtgataacatggcattgaattcaatggagctctgggaaaataaaactctgattgttctg    |            |
|         | tgacagacaaatagcaactaaaagacaaatattcatcagagtg                                  |            |
|         | cagtataaaacaagaaatTTGCCTGTGAAAACAGACCTTTCATTTCTAGGAGGTGGAAGCACTTCATTG        |            |
| HAV-II  | acaattcctcctgggcatacttagtctctgctccaacctcaagtctaattctttgatggtttctgctctcaat    | 91.69%     |
|         | atgacttcaaatctcctatcttctctgatctgggatcatccactgaagattccaaatctccagctgcaattctgc  |            |
|         | tcatcatagtttcagtgacagcatagcattagattcaagggggcccttgaaaataaaactctgactctca       |            |
|         | gtaacagatagataacagctaaaagacaaatattcatcagaatg                                 |            |
|         | tgtaaaaaaggagattttgcttgtaaaacacacccttaattttacgaggaggaggcaacttcatttgac        |            |
|         | aattctcctgagcatatttaagtcttctacctacccaatcttaactttataagtttctcttttcaaat         |            |
| AV-III  | gacttcaaatcagatcctcctcagatcgggatcatcaactgaggattcaagatcaccaagagcaattctat      | 90.39%     |
|         | ccatcattgttctgatgacatcatagcattgttattcaagggtctctaggaaaataaaactcagactgttcag    |            |
|         | tcacagacaagtaacagctaaaagacaaatattcatctgagtg                                  |            |
|         | cagtataaaacaagaaatTTGCCTGTGAAAACAGACCTTTCATTTCTAGGAGGTGGAAGCACTTCATTG        |            |
|         | acaattcctcctgggcatacttagtctctgctccaacctcaagtctaattctttgatggtttctgctctcaat    |            |
|         | atgacttcaaatctcctatcttctctgatctgggatcatccactgaagattccaaatctccagctgcaattctgc  |            |
| HAV-VII | tcatcatagtttcagtgacagcatagcattagattcaagggggcccttgaaaataaaactctgactctca       | 92.46%     |
|         | gtaacagatagataacagctaaaagacaaatattcatcagaatg                                 |            |
|         |                                                                              |            |

Fig S3. Validation of NASBA amplification efficiency by agarose gel electrophoresis and concentration determination

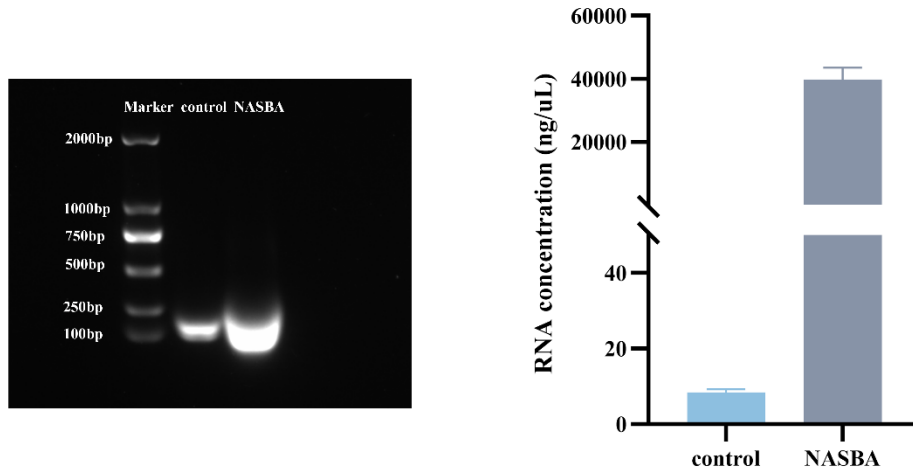

Fig S4. Results of the HAV I detection sensitivity with RT-PCR

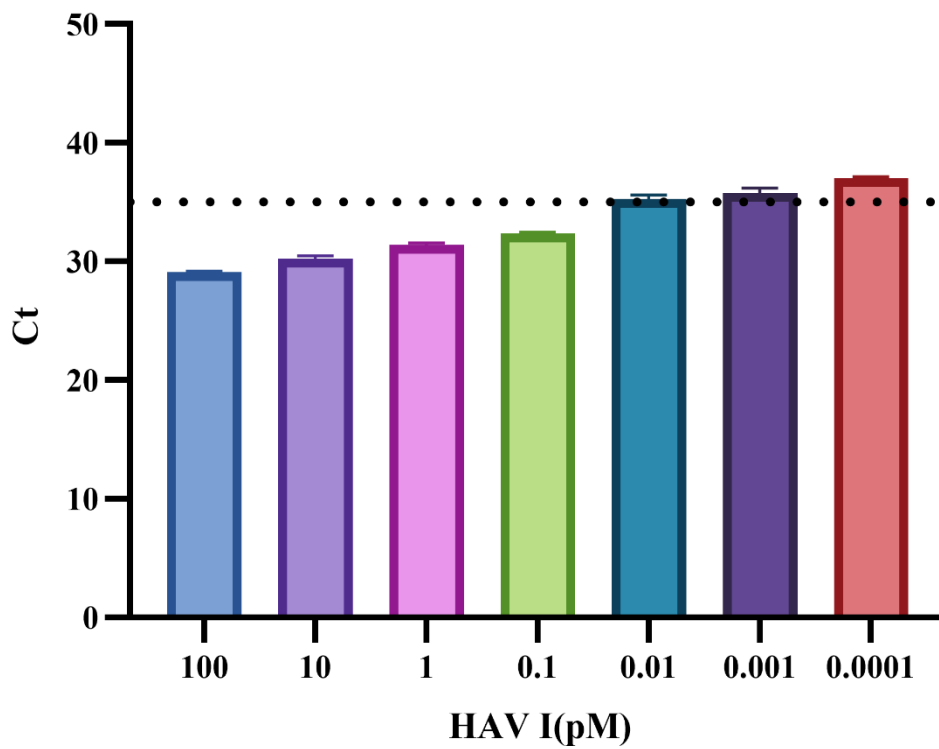

Fig S5. Curves of fluorescence.

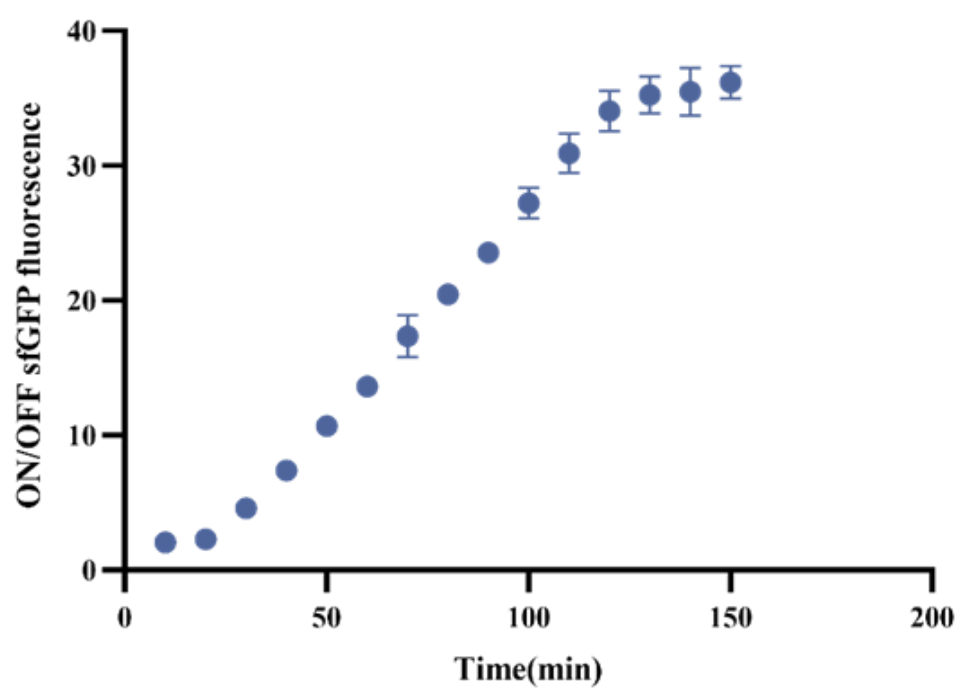

Supplement: d3ay01408h1.pdf [file d3ay01408h1.pdf]
